# Supplementary material for: Broadly neutralizing antibodies against Zika virus from dengue patients with prior exposure to Japanese encephalitis virus
Source: Research Square preprint supplement (doi:10.21203/rs.3.rs-2969700/v1), 2023-06-07
Supplement: Supplementary file 1 [file 1e56a9156bb36a35c0448582.xlsx]

## Sheet: S1. Panel of donors
Supplementary Table 1. Panel of healthy and dengue-infected plasma at the acute phase with the corresponding DENV, JEV, YFV, and ZIKV neutralization profiles
Classification	Age group	Serum sample ID	Travel history within the last five years	FRµNT90*
				DENV-1	DENV-2	DENV-3	DENV-4	JEV	ZIKV	YFV
Dengue-negative or Healthy
	20-30	830	No	<10	<10	<10	<10	17.116	<10	<10
	20-30	832	No	<10	<10	<10	<10	<10	<10	<10
	20-30	833	No	<10	<10	<10	<10	<10	<10	<10
	20-30	834	No	<10	<10	<10	<10	<10	<10	<10
	20-30	835	No	<10	<10	<10	<10	18.07	<10	<10
	20-30	836	No	<10	<10	<10	<10	<10	<10	<10
	20-30	837	No	<10	<10	<10	<10	<10	<10	<10
	20-30	838	No	<10	<10	<10	<10	<10	<10	<10
	20-30	839	No	<10	<10	<10	<10	<10	<10	<10
	20-30	840	No	<10	<10	<10	<10	<10	<10	<10
	20-30	841	No	<10	<10	<10	<10	<10	<10	<10
	20-30	842	No	<10	<10	<10	<10	13.987	<10	<10
	20-30	843	No	<10	<10	<10	<10	<10	<10	<10
	20-30	844	No	<10	<10	<10	<10	10	<10	<10
	20-30	845	No	<10	<10	<10	<10	<10	<10	<10
	20-30	846	No	<10	<10	<10	<10	<10	<10	<10
	20-30	847	No	<10	<10	<10	<10	<10	<10	<10
	20-30	848	No	<10	<10	<10	<10	<10	<10	<10
	20-30	849	No	<10	<10	<10	<10	<10	<10	<10
	20-30	851	No	<10	<10	<10	<10	50	10	<10
	20-30	1036	No	<10	<10	<10	<10	<10	<10	<10
	20-30	1050	No	<10	<10	<10	<10	<10	<10	<10
	20-30	1052	No	<10	<10	<10	<10	<10	<10	<10
	20-30	1054	No	<10	<10	<10	<10	<10	<10	<10
	20-30	1059	No	<10	<10	<10	<10	10	<10	<10
	20-30	1062	No	<10	<10	<10	<10	<10	<10	<10
	20-30	1064	No	<10	30.7498	<10	<10	<10	<10	<10
	20-30	1070	No	<10	<10	<10	<10	<10	<10	<10
	20-30	1071	No	<10	<10	<10	<10	<10	<10	<10
	20-30	1075	No	<10	<10	<10	<10	<10	<10	<10
	20-30	1081	No	<10	<10	<10	<10	<10	<10	<10
	20-30	1131	No	<10	<10	<10	<10	<10	<10	<10
	20-30	1140	No	<10	<10	<10	<10	<10	<10	<10
	20-30	1172	No	<10	<10	<10	<10	<10	<10	<10
	20-30	1207	No	<10	<10	<10	<10	<10	<10	<10
	20-30	1208	No	<10	<10	<10	<10	<10	<10	<10
	20-30	1209	No	<10	<10	<10	<10	<10	<10	<10
	20-30	1240	No	<10	<10	<10	<10	<10	<10	<10
	20-30	1265	No	<10	<10	<10	<10	<10	<10	<10
	20-30	1287	No	<10	<10	<10	<10	<10	<10	<10
	50-70	317	No	<10	<10	<10	<10	<10	<10	<10
	50-70	524	No	<10	<10	<10	<10	<10	<10	<10
	50-70	531	No	<10	<10	<10	<10	<10	<10	<10
	50-70	538	No	<10	<10	<10	<10	<10	<10	<10
	50-70	546	No	<10	<10	<10	<10	64.364	<10	<10
	50-70	999	No	<10	<10	<10	<10	27.221	<10	<10
	50-70	1336	No	<10	<10	<10	<10	<10	<10	<10
	50-70	1337	No	<10	<10	<10	<10	<10	<10	<10
	50-70	1343	No	<10	<10	<10	<10	<10	<10	<10
	50-70	1350	No	<10	<10	<10	<10	<10	<10	<10
	50-70	1352	No	<10	<10	<10	<10	22.394	<10	<10
	50-70	1354	No	<10	<10	<10	<10	<10	<10	<10
	50-70	1360	No	<10	<10	<10	<10	<10	<10	<10
	50-70	1368	No	<10	<10	<10	<10	<10	<10	<10
	50-70	1373	No	<10	<10	<10	<10	46.355	<10	<10
	50-70	1397	No	<10	<10	<10	<10	<10	<10	<10
	50-70	1403	No	<10	<10	<10	<10	<10	<10	<10
	50-70	1407	No	<10	17	<10	<10	988.646	10	<10
	50-70	1409	No	<10	<10	<10	<10	<10	<10	<10
	50-70	1411	No	<10	<10	<10	<10	169.621	<10	<10
	50-70	1000	No	<10	<10	<10	<10	54.5433	<10	<10
	50-70	1091	No	<10	<10	<10	<10	45.0732	<10	<10
	50-70	1116	No	<10	<10	<10	<10	21.3255	<10	<10
	50-70	1173	No	<10	<10	<10	<10	10.1334	<10	<10
	50-70	1181	No	<10	<10	<10	<10	144.231	<10	<10
	50-70	1184	No	<10	<10	<10	<10	<10	<10	<10
	50-70	1250	No	<10	<10	<10	<10	<10	<10	<10
	50-70	1331	No	<10	<10	<10	<10	<10	<10	<10
	50-70	1340	No	<10	<10	<10	<10	38.0721	<10	<10
	50-70	1341	No	<10	<10	<10	<10	<10	<10	<10
	50-70	1359	No	<10	<10	<10	<10	32.3292	<10	<10
	50-70	1364	No	<10	<10	<10	<10	<10	<10	<10
	50-70	1380	No	<10	<10	<10	<10	<10	<10	<10
	50-70	1383	No	<10	<10	<10	<10	<10	<10	<10
	50-70	1385	No	<10	10.0824	<10	<10	<10	<10	<10
	50-70	1406	No	<10	<10	<10	<10	17.8894	<10	<10
	50-70	1410	No	<10	<10	<10	<10	<10	<10	<10
	50-70	1413	No	68.4745	27.4013	19.0382	<10	<10	<10	<10
	50-70	1441	No	<10	<10	<10	<10	<10	<10	<10
	50-70	1491	No	<10	<10	<10	<10	<10	<10	<10
Primary DENV†
	20-30	1098	No	91.1816	44.7906	36.4489	<10	10.8566	<10	<10
	20-30	1116	No	29.3264	10.8397	11.7945	<10	<10	<10	<10
	20-30	1971	No	11.6657	16.152	<10	9.6697	<10	<10	<10
	20-30	1873	No	20.5758	248.08	12.4909	<10	<10	<10	<10
	20-30	1989	No	<10	<10	10.1323	<10	<10	<10	<10
	20-30	2263	No	23.3639	684.036	134.467	37.0908	<10	<10	<10
	20-30	2591	No	65.3947	583.402	52.2646	<10	46.296	22.407	<10
	20-30	2827	No	63.7097	2016.17	418.06	41.108	14.504	21.483	<10
	20-30	2177	No	<10	205.644	<10	<10	<10	<10	<10
	20-30	2201	No	<10	10.2	<10	<10	31.9111	<10	<10
	20-30	2532	No	32.9666	484.134	39.0079	38.9908	15	<10	<10
	20-30	2723	No	141.189	1037.96	40.9903	52.08	14.7122	<10	<10
	20-30	2997	No	106.744	1390.87	61.6301	75.313	<10	<10	<10
	20-30	671	No	<10	<10	28.8153	<10	11.35	15.548	<10
	20-30	506	No	15	18.542	727.166	22.9719	<10	<10	<10
	50-70	135	No	40960	2532.84	5366.24	1278.02	744.455	5146.75	<10
	50-70	2253	No	15420.1	3235.79	3438.42	1777.9	5754.15	344.476	<10
	50-70	2535	No	213.212	38.302	22.6854	<10	<10	<10	<10
	50-70	1891	No	9595.11	1894.83	2154.63	1204.78	10	338.18	<10
	50-70	2896	No	293.372	11774.9	282.26	801.374	3208.54	217.278	<10
	50-70	1188	No	<10	10	<10	<10	<10	<10	<10
	50-70	2222	No	11	70.0845	<10	<10	56.1159	<10	<10
Repeat DENV
	20-30	700	No	46.0001	<10	59.0099	<10	144.467	43.166	<10
	20-30	851	No	709.379	22.033	399.175	35.2848	<10	10	<10
	50-70	2078	No	29214.4	6231.19	8778.72	4964.78	1542.19	1062.47	<10
	50-70	2665	No	22	158.116	237.702	30.0904	<10	<10	<10
	20-30	676	No	<10	<10	<10	<10	15	<10	<10
	20-30	781	No	219.516	69.31	78.8711	15	72.077	60	<10
	20-30	2702	No	772.915	90	797.666	1757.57	1800	778.386	<10
	50-70	39	No	22000	11774.9	6008.74	1655.83	2995.99	427.425	<10
	50-70	2831	No	335.692	862.24	65.1371	103.012	26.484	212.009	<10
	20-30	403	No	25	53.846	20	15.3718	10	30	<10
	20-30	2466	No	13748.2	11088.9	4056.83	3940.65	1564.26	1500	<10
	20-30	2585	No	140.697	248.031	145.543	185.081	441.159	233.212	<10
	50-70	35	No	2037.26	1207.76	1258.69	1283.75	1490.21	867.439	<10
	50-70	45	No	1862.96	522.515	1754.14	506.164	6009.55	582.809	<10
	50-70	1991	No	673.158	553.613	190.781	441.212	462.069	305	<10
	50-70	2727	No	9933.15	6761.78	2560	2587.22	1971.94	660.489	<10
	50-70	3023	No	539.572	673.373	684.006	565.314	1026.56	690.84	<10
	50-70	3027	No	1970.28	866.41	2089.29	2658.5	2645.08	1300	<10
	50-70	3041	No	162.006	272.71	80	155.787	690.657	179.183	<10
	20-30	2100	No	<10	<10	15.9979	<10	<10	<10	<10
	20-30	3045	No	<10	45.6692	<10	<10	<10	<10	<10
	20-30	3143	No	<10	<10	<10	<10	<10	<10	<10
	50-70	1948	No	2185.84	749.621	231.592	143.152	57.2765	15	<10
	50-70	2978	No	14331.4	2980.32	6800.08	3411.72	34.4045	98.193	<10
	50-70	2980	No	515.85	1288.28	277.178	215.999	72.2102	21	<10
	50-70	3001	No	468.775	650.332	132.681	178.654	72.6493	<10	<10
	20-30	2160	No	576.548	200.376	174.832	52.5664	28.4752	<10	<10
	50-70	2889	No	9192.09	3828.44	6995.97	954.281	<10	262.487	<10
	50-70	1050	No	1353.93	205.291	1157.1	545.96	505.684	43.9488	<10
	50-70	1284	No	1693.4	648.477	1647.33	171.79	185.14	210.627	<10
	20-30	1945	No	256.091	284.399	116.102	49.5167	20.207	<10	<10
	50-70	1975	No	28764.2	40960	20480	1893.59	303.151	467.938	<10
	50-70	2868	No	2282.38	1817.12	912.101	521.256	77.4371	59.3305	<10
	50-70	2686	No	422.292	1574.77	169.217	134.254	377.294	16.4176	<10
	20-30	2865	No	73.1663	392.122	123.659	51.1465	492.852	12.4383	<10
	50-70	1097	No	2074.08	1062.05	225.375	681.966	1847.48	39	<10
	20-30	1115	No	50.7787	89.169	67.127	48.325	43.9644	<10	<10
	50-70	2049	No	336.685	802.733	2423.66	599.5	1765.93	1303.48	<10
*DENV, dengue virus; JEV, Japanese encephalitis virus; YFV, Yellow fever virus; ZIKV, Zika virus; FRµNT90, antibody dilution at 90% virus inhibition; ID, identification
† Primary defined as reciprocal FRµNT90 titer that is at least 4-fold greater for one serotype.
Repeat defined as reciprocal FRµNT90 titer where the highest titer is not 4-fold greater than the second highest titer.

## Sheet: S2. Human primers for RT-PCR
Supplementary Table 2. Human monoclonal antibody isolation primers used in this study.
1st PCR Primers		5'-> 3' sequence
Human Heavy chain
5’ L-VH1		ACAGGTGCCCACTCCCAGGTGCAG
5’ L-VH3		AAGGTGTCCAGTGTGARGTGCAG
5’ L-VH 4/6		CCCAGATGGGTCCTGTCCCAGGTGCAG
5’ L-VH 5		CAAGGAGTCTGTTCCGAGGTGCAG
3’ Cɣ CH1		GGAAGGTGTGCACGCCGCTGGTC
Human Kappa Light chain
5’ L VK 1/2		ATGAGGSTCCCYGCTCAGCTGCTGG
5’ L VK 4		ATTTCTCTGTTGCTCTGGATCTCTG
3’ CƘ 543-566		GTTTCTCGTAGTCTGCTTTGCTCA
2nd PCR Primers		5'-> 3' sequence
Human Heavy chain: AgeI huVH Forward Primer mix
5' AgeI huVH1		CTTGTCCTTGTTTTAACCGGTGTCCAGTGTCAGGTGCAGCTGGTGCAG
5’ AgeI huVH1-2		CTTGTCCTTGTTTTAACCGGTGTCCAGTGTCAGGTGCAGGTGGTGCAG
5’ AgeI huVH1/5		CTTGTCCTTGTTTTAACCGGTGTCCAGTGTGAGGTGCAGCTGGTGCAG
5’ AgeI huVH1-18		CTTGTCCTTGTTTTAACCGGTGTCCAGTGTCAGGTTCAGCTGGTGCAG
5’ AgeI huVH1-24		CTTGTCCTTGTTTTAACCGGTGTCCAGTGTCAGGTCCAGCTGGTACAG
5’ AgeI huVH3		CTTGTCCTTGTTTTAACCGGTGTCCAGTGTGAGGTGCAGCTGGTGGAG
5’ AgeI huVH3 -23		CTTGTCCTTGTTTTAACCGGTGTCCAGTGTGAGGTGCAGCTGTTGGAG
5’ AgeI huVH3-33		CTTGTCCTTGTTTTAACCGGTGTCCAGTGTCAGGTGCAGCTGGTGGAG
5’ AgeI huVH3-9/30/33		CTTGTCCTTGTTTTAACCGGTGTCCAGTGTGAAGTGCAGCTGGTGGAG
5’ AgeI huVH4		CTTGTCCTTGTTTTAACCGGTGTCCAGTGTCAGGTGCAGCTGCAGGAG
5’ AgeI huVH4-34		CTTGTCCTTGTTTTAACCGGTGTCCAGTGTCAGGTGCAGCTACAGCAGTG
5' AgeI huVH 4-39		CTTGTCCTTGTTTTAACCGGTGTCCAGTGTCAGCTGCAGCTGCAGGAG
5’ AgeI huVH 6-1de		CTTGTCCTTGTTTTAACCGGTGTCCAGTGTCAGGTRCAGCTGCAGCAG
Human Heavy chain: SalI huJH Reverse Primer mix
3' SalI huJH 1/2/4/5		GACCGATGGGCCCTTGGTCGACGCKGARGAGACGGTGACCA
3' SalI huJH 1/2/4/5B		GACCGATGGGCCCTTGGTCGACGCTGAGGAGACAGAGACCAG
3' SalI huJH 3		GACCGATGGGCCCTTGGTCGACGCTGAAGAGACGGTGACCATTG
3' SalI huJH 4/6		GACCGATGGGCCCTTGGTCGACGCGGAGCTCACTGTCACGCT
3' SalI huJH 6		GACCGATGGGCCCTTGGTCGACGCTGARGAGACGGTGACCGTG
3' SalI huJH 6B		GACCGATGGGCCCTTGGTCGACGCTGAGGAGACGGTGAGTGT
2nd PCR Primers		5'-> 3' sequence
Human Kappa Light Chain: 5'-AgeI huVK Forward Primer mix
5’ AgeI huVK1-5		CTTGTCCTTGTTTTAACCGGTGTCCAGTGTGACATCCAGATGACCCAGTC
5’ AgeI huVK1-9		CTTGTCCTTGTTTTAACCGGTGTCCAGTGTGACATCCAGTTGACCCAGTCT
5’ AgeI huVK1-8/1D-8		CTTGTCCTTGTTTTAACCGGTGTCCAGTGTGYCATCYGGATG
5’ AgeI huVK1D-43		CTTGTCCTTGTTTTAACCGGTGTCCAGTGTGCCATCCGGATGACCCAGTC
5’ AgeI huVK2-24		CTTGTCCTTGTTTTAACCGGTGTCCAGTGTGATATTGTGATGACCCAGAC
5’ AgeI huVK2-28		CTTGTCCTTGTTTTAACCGGTGTCCAGTGTGATATTGTGATGACTCAGTC
5’ AgeI huVK2-30		CTTGTCCTTGTTTTAACCGGTGTCCAGTGTGATGTTGTGATGACTCAGTC
5’ AgeI huVK3-11		CTTGTCCTTGTTTTAACCGGTGTCCAGTGTGARATYGTGYTGACMCAGWC
5’ AgeI huVK3-11/3-15		CTTGTCCTTGTTTTAACCGGTGTCCAGTGTGAAATWGTGWTGAYSCAG
5’ AgeI huVK3-15		CTTGTCCTTGTTTTAACCGGTGTCCAGTGTGAAATAGTGATGACGCAGTC
5’ AgeI huVK3D-15		CTTGTCCTTGTTTTAACCGGTGTCCAGTGTGAAATAGTGATGAYGCAG
5’ AgeI huVK3-20		CTTGTCCTTGTTTTAACCGGTGTCCAGTGTGAAATTGTGTTGACRCAGTCT
5’ AgeI huVK4-1		CTTGTCCTTGTTTTAACCGGTGTCCAGTGTGACATCGTGATGACCCAGTC
Human Kappa Light Chain: 3'-BsiWI huVK Reverse Primer mix
3' BsiWI huJK 1/4		GATGGCGCCGCCACCGTACGYTTGATYTCSACCTTKGT
3' BsiWI huJK 1/4B		GATGGCGCCGCCACCGTACGYTTKAAYTCSACCTTKGT
3' BsiWI huJK 2E		GATGGCGCCGCCACCGTACGYGTGATYTCSACCTTKGT
3' BsiWI huJK 2		GATGGCGCCGCCACCGTACGYTTGATYTCCAGCTTKGT
3' BsiWI huJK 2B		GATGGCGCCGCCACCGTACGYTTGATCCCCAGCTTKGT
3' BsiWI huJK 2C		GATGGCGCCGCCACCGTACGNGTGATYTCCAGCTTKGT
3' BsiWI huJK 2D		GATGGCGCCGCCACCGTACGYTTGATCTCCCAGCTTGG
3' BsiWI huJK 2-28		GATGGCGCCGCCACCGTACGNKTGATYTCNACGCTTGG
3' BsiWI huJK 3		GATGGCGCCGCCACCGTACGTTTGATATCCACTTTGGTC
3' BsiWI huJK 4		GATGGCGCCGCCACCGTACGYCTGATYTCNACCTTKGT
3' BsiWI huJK 5		GATGGCGCCGCCACCGTACGYTTAATCTCCAGTCGTGTC
The primer mixes for the second-round PCRs included 20-30 bp sequences complementary to the 5’- or 3’- ends of the heavy- or kappa light chain expression vector. Sequences targeting the estriction enzyme sites are highlighted in red while the sequences in blue are part of the vector backbone.

## Sheet: S3. SDM primers on ZIKV VLP
Supplementary Table 3. Primers used for site-directed mutagenesis on ZIKV VLP
Original AA	AA position	Primer name	Primer Sequence (5' --> 3')	Length, bp	Mismatches, bp	Tm (°C)
Arginine, R	73	R73A FP	5' --- ATGGCCAGCGACAGCgcATGCCCCACACAGGGC ---3'	33	2	69
		R73A RP	5' --- GCCCTGTGTGGGGCATgcGCTGTCGCTGGCCAT ---3'	33	2	69
Threonine, T	76	T76A FP	5' --- ACAGCAGATGCCCCgCACAGGGCGAGGCTTAC ---3'	32	1	71
		T76A RP	5' --- GTAAGCCTCGCCCTGTGcGGGGCATCTGCTGT ---3'	32	1	68
Aspartic Acid, D	87	D87A FP	5' --- CTGGACAAGCAGTCCGcCACCCAGTACGTGTGC ---3'	33	1	67
		D87A RP	5' --- GCACACGTACTGGGTGgCGGACTGCTTGTCCAG ---3'	33	1	70
Asparagine, N	103	N103A FP	5' --- GGATAGAGGCTGGGGCgcTGGCTGCGGCCTG ---3'	31	2	67
		N103A RP	5' --- CAGGCCGCAGCCAgcGCCCCAGCCTCTATCC ---3'	31	2	67
Arginine, R	193	R193A FP	5' --- CTGGACTGCGAGCCTgcAACCGGCCTGGATTTC ---3'	33	2	64
		R193A RP	5' --- GAAATCCAGGCCGGTTgcAGGCTCGCAGTCCAG ---3'	33	2	64
Threonine, T	231	T231A FP	5' --- TGGCATGCCGGCGCTGATgCAGGCACACCCCACTGG ---3'	36	1	75
		T231A RP	5' --- CCAGTGGGGTGTGCCTGcATCAGCGCCGGCATGCCAG ---3'	36	1	75
Glycine, G	302	G302A FP	5' --- CAAGCTGCGGCTGAAGGcCGTGTCCTACAGCCTG ---3'	34	1	69
		G302A RP	5' --- CAGGCTGTAGGACACGgCCTTCAGCCGCAGCTTG ---3'	34	1	72
Threonine, T	366	T366A FP	5' --- CCGCCAACCCTGTGATCgCCGAGAGCACCGAGAAC ---3'	35	1	71
		T366A RP	5' --- GTTCTCGGTGCTCTCGGcGATCACAGGGTTGGCGG ---3'	35	1	69
For all primers, the mutagenesis oligonucleotides were denoted in lower case and colored in red.
Tm is the melting temperature of mutagenic oligonucleotide primers annealing with the WT template. AA= amino acids; bp = base pairs.
