# Supplementary figures and images for: Broadly neutralizing antibodies against Zika virus from dengue patients with prior exposure to Japanese encephalitis virus
Source: Research Square preprint supplement (doi:10.21203/rs.3.rs-2969700/v1), 2023-06-07

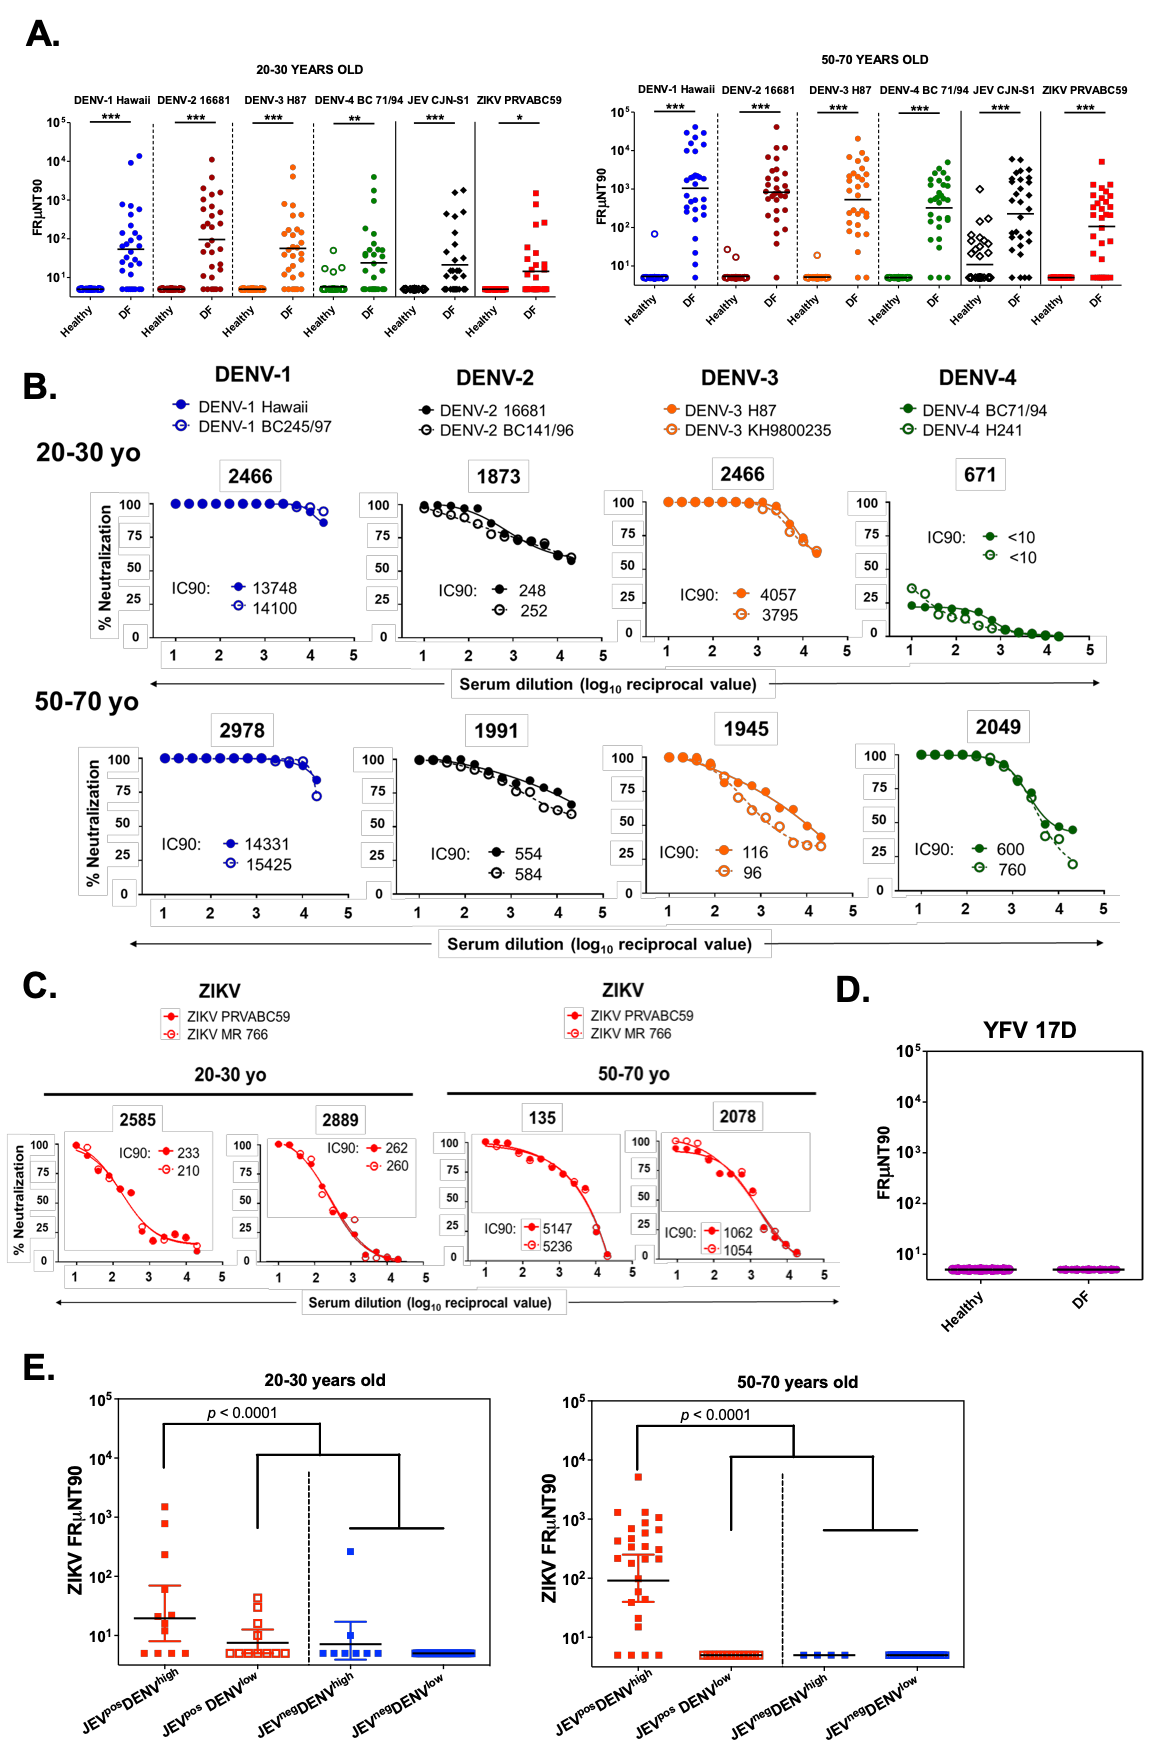


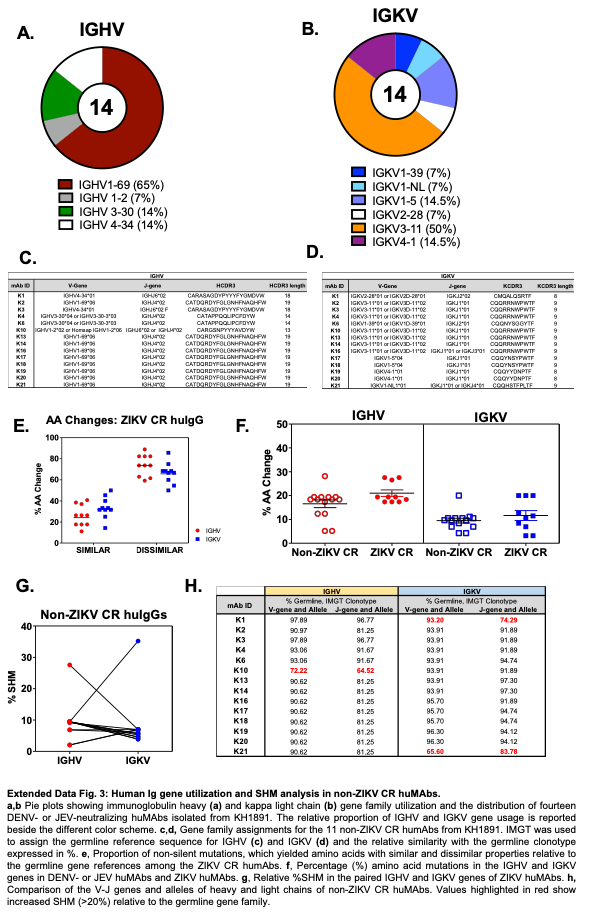


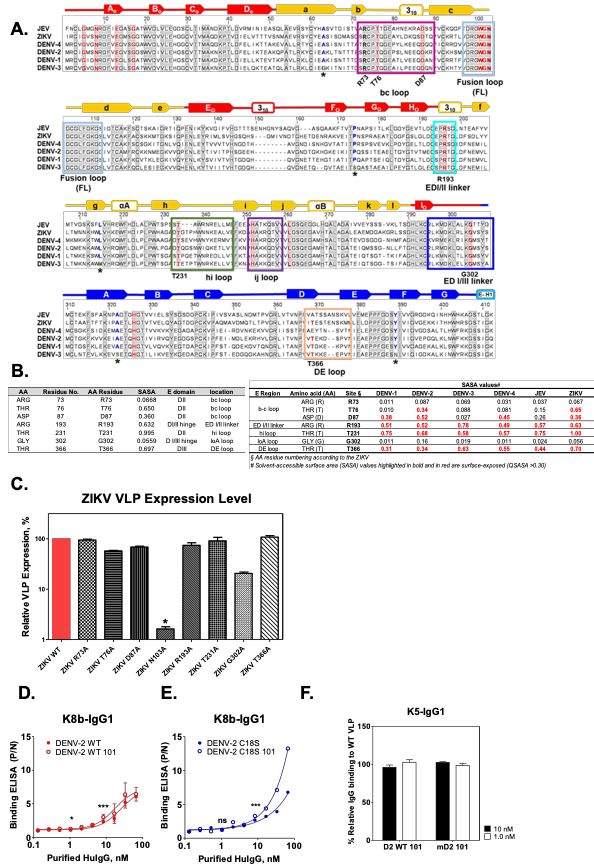


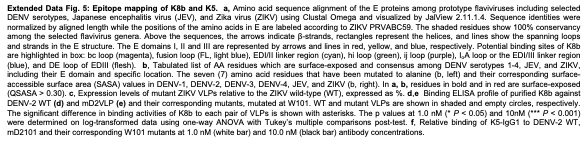


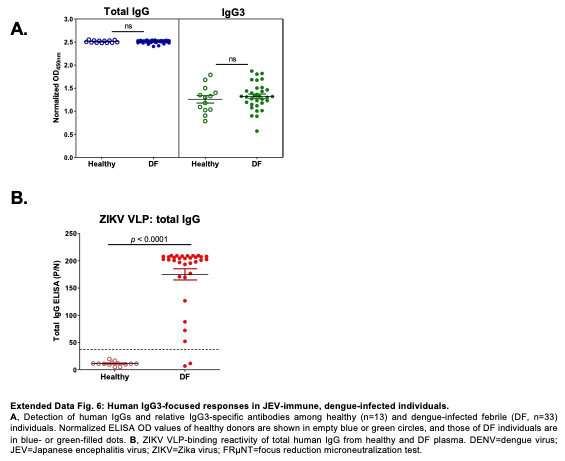


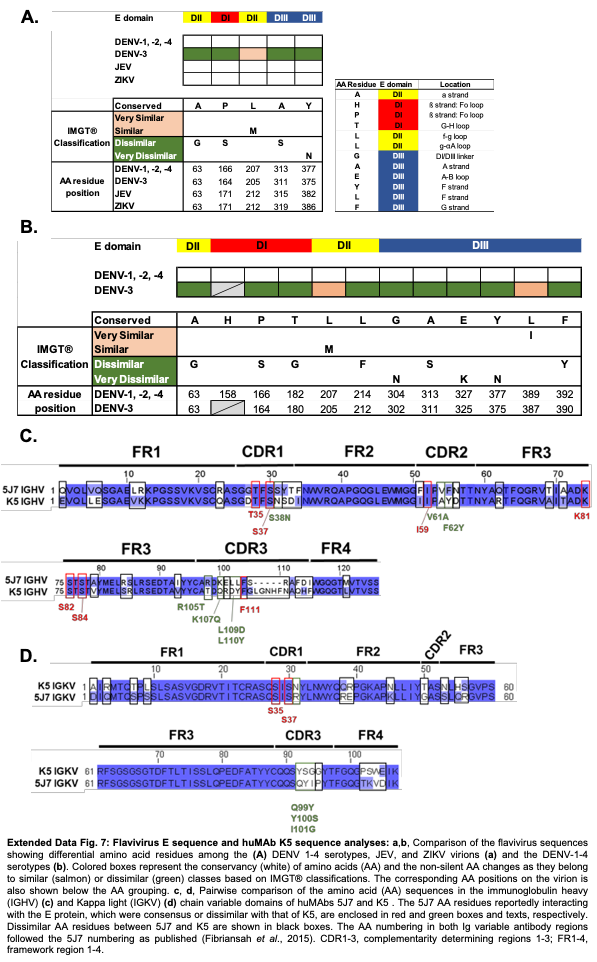


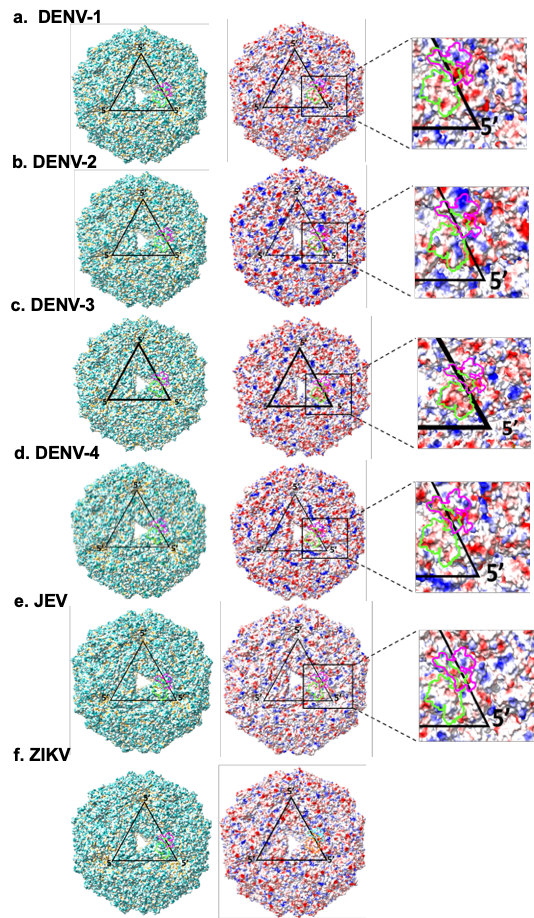


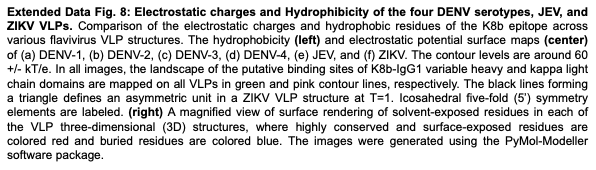


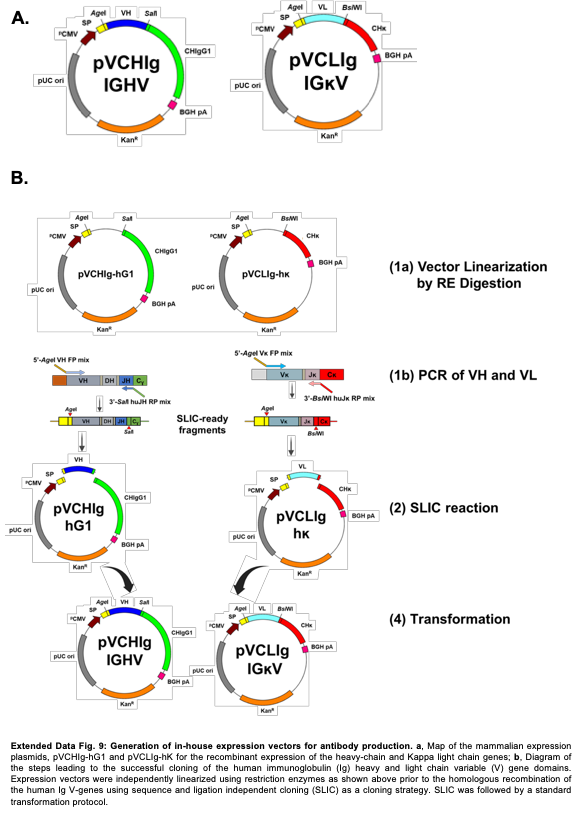

Supplement: Supplementary file 2 [file e9fe1b458e9621e59a10a7a3.docx]
